# Supplementary material for: Discovery of a Sexual Cycle in Aspergillus lentulus, a Close Relative of A. fumigatus
Source: PubMed Central journal article supplement (PMC3697472; doi:10.1128/ec.00040-13), 2013-07
Supplement: EC.00040-13_zek999094117so1.pdf [file EC.00040-13_zek999094117so1.pdf]

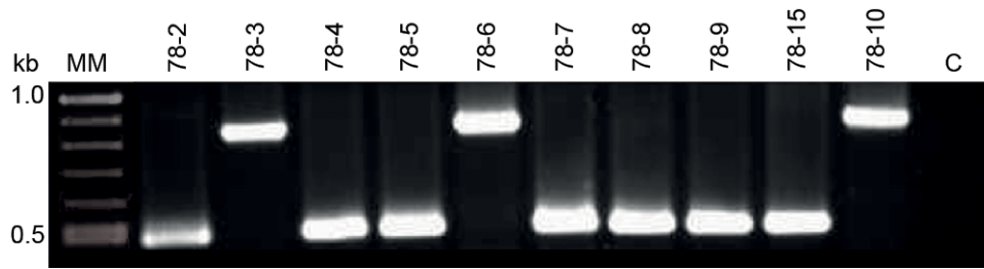

**Fig. S1.** Representative results from the multiplex mating-type PCR assay to determine the mating type of isolates of *A. lentulus*. Lanes 2-11 show amplicons of either ca. 834 bp (*MATI-1*) or 438 bp (*MATI-2*) from ten isolates (code numbers are indicated above each lane). MM, molecular weight marker; C, water control.

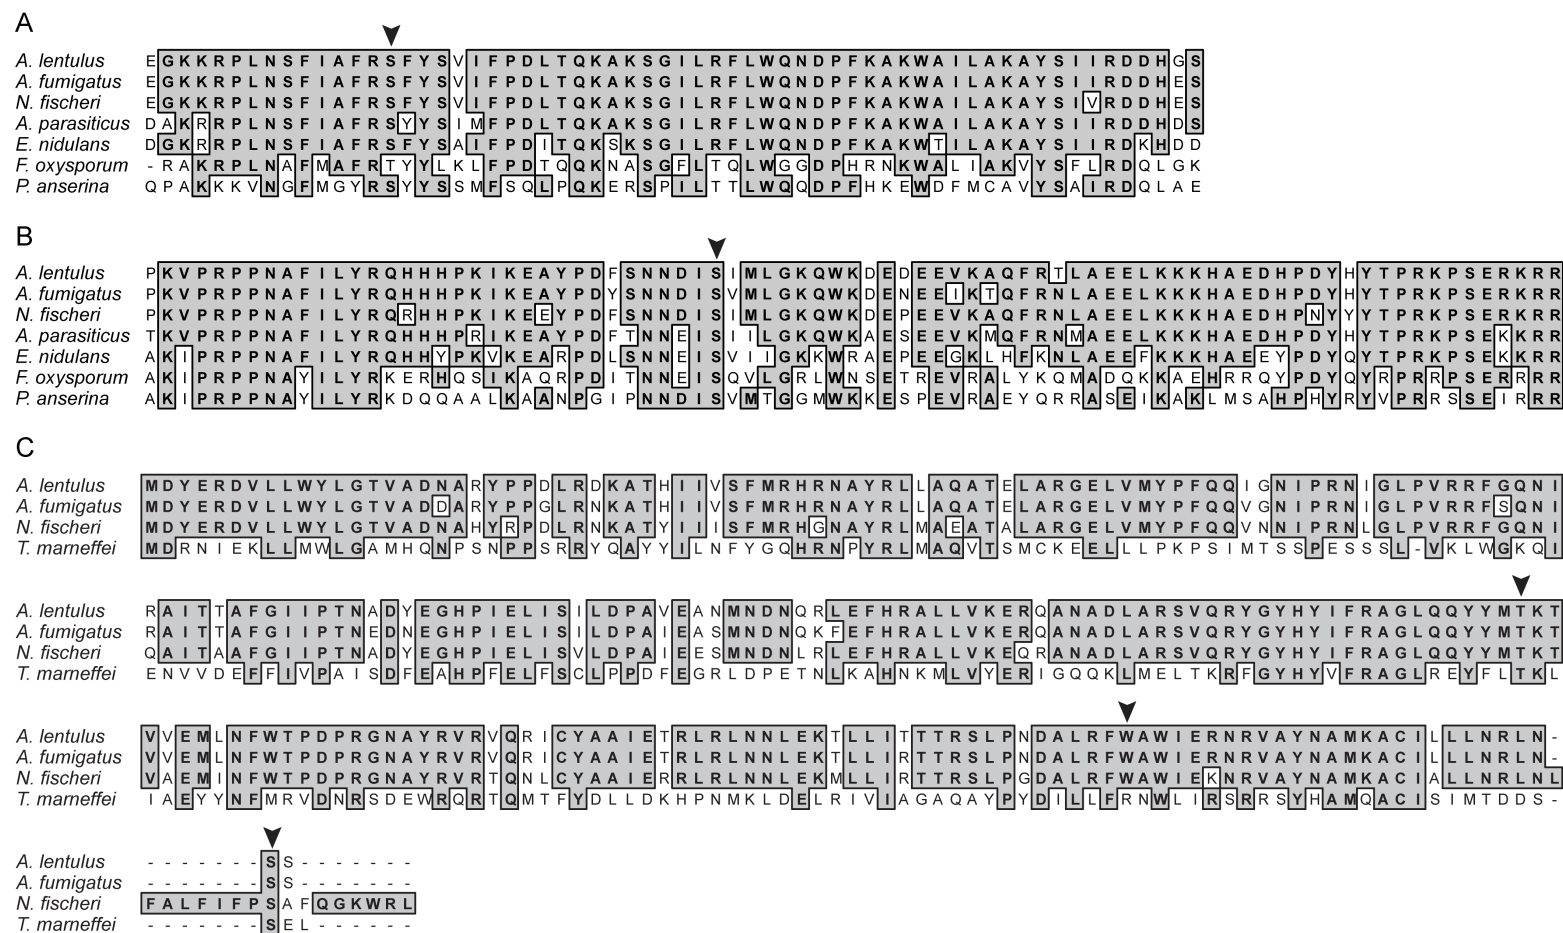

**Fig. S2.** Multiple alignments of predicted proteins from the *A. lentulus* sequences of the *MAT1-1-1*  $\alpha 1$  domain, *MAT1-2-1* HMG domain, and *MAT1-2-4* ORF (the full sequence of *MAT1-2-4* is provided as there is no known domain present). Alignments show conservation with (A)  $\alpha 1$  domain regions of MAT1-1 proteins, (B) HMG domain regions of MAT1-2 proteins, and (C) MAT1-2-4 translated ORFs, from other ascomycete fungi. Inverted arrows indicate locations of conserved introns. NCBI Accession numbers: *Aspergillus fumigatus* [EDP53120 (MAT1-1); XP\_754989 (MAT1-2); XP\_754990 (MAT1-2-4)], *Neosartorya fischeri* [XP\_001263836 (MAT1-1); XP\_001263957 (MAT1-2); XP\_001263958 (MAT1-2-4)], *Aspergillus parasiticus* [ACA51903 (MAT1-1); ACA51906 (MAT1-2)], *Emericella nidulans* [ABC87272 (MAT1-1); AAQ07985 (MAT1-2)], *Fusarium oxysporum* [CAI45427 (MAT1-1); BAA28611 (MAT1-2)], *Podospora anserina* [P35692 (MAT1-1); P35693 (MAT1-2)], *Talaromyces marneffeii* [XP\_002488739 (MAT1-2-4)].

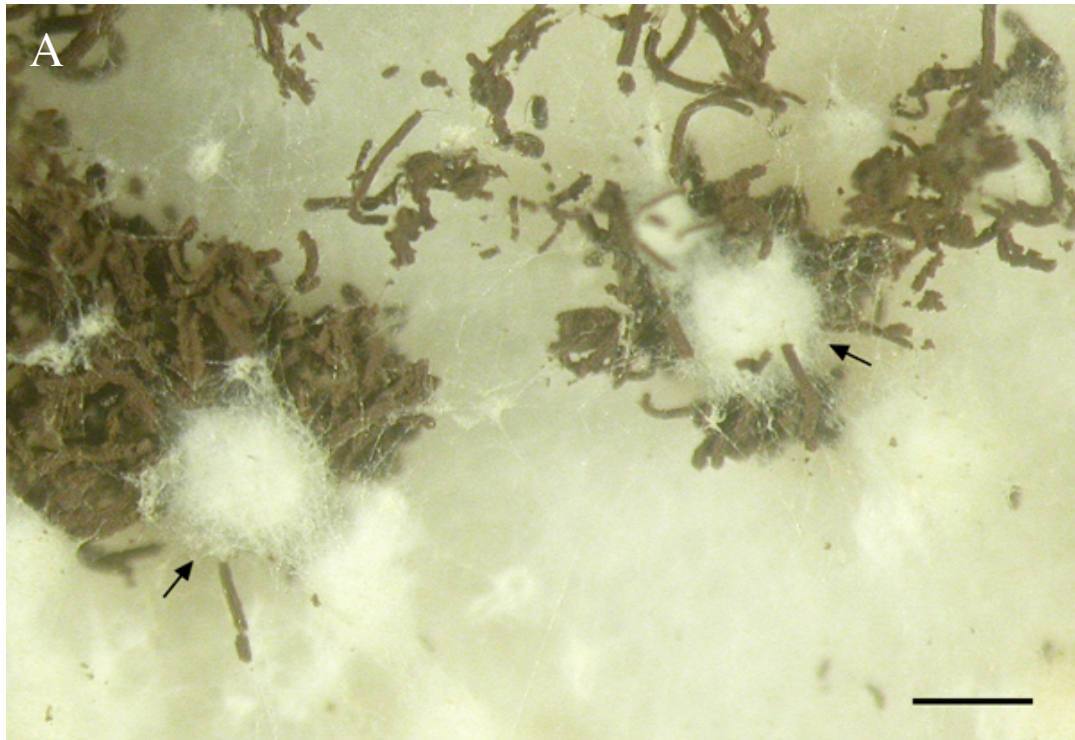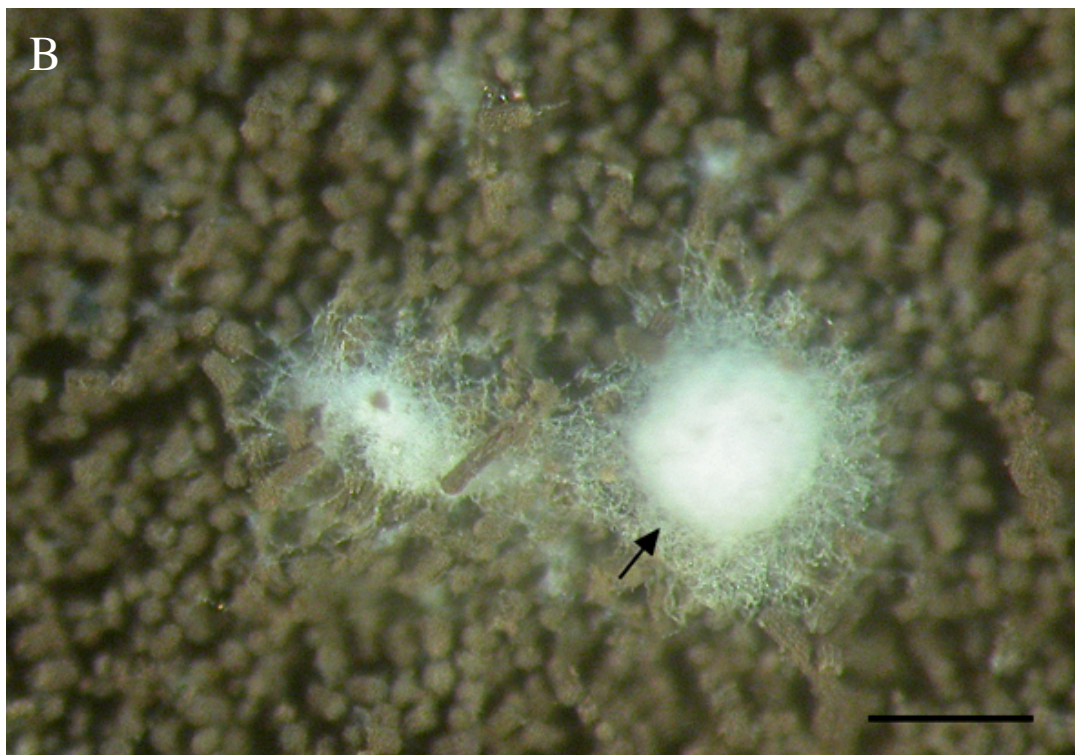

**Fig. S3.** Hyphal aggregates possibly representing abortive cleistothecia (arrowed) from two eight-month-old crosses between *A. fumigatus* strain AFB62 (*MAT1-1*) and *A. lentulus* strain 78-2 (*MAT1-2*). Scale bars, 150  $\mu$ m.

**Table S1.** Details of *Aspergillus lentulus* isolates used in the study and their *MAT* locus genotype

| BDUN number <sup>a</sup> | Alternative strain number(s) <sup>b</sup>           | Source        | Isolation site <sup>c</sup> | Country <sup>c</sup> | State/County <sup>c</sup> | <i>MAT</i> Locus | Reference |
|--------------------------|-----------------------------------------------------|---------------|-----------------------------|----------------------|---------------------------|------------------|-----------|
| 78-1 <sup>d,e</sup>      | FH 5, CBS 117885, IBT 27201, KACC 41940, NRRL 35552 | Clinical      | Mouth                       | USA                  | Washington                | <i>MAT1-2</i>    | (2)       |
| 78-2 <sup>d</sup>        | CBS 116881, IBT 24948, KACC 41686                   | Environmental | Soil of maize field         | Republic of Korea    | Yeongi                    | <i>MAT1-2</i>    |           |
| 78-3 <sup>d</sup>        | CBS 116882, KACC 41395                              | Environmental | Soil of pepper field        | Republic of Korea    | Chungju                   | <i>MAT1-1</i>    | (1)       |
| 78-4 <sup>d</sup>        | CBS 116883, KACC 41393                              | Environmental | Soil of pepper field        | Republic of Korea    | Daejeon                   | <i>MAT1-2</i>    | (1)       |
| 78-5 <sup>d</sup>        | CBS 117884, FH 4                                    | Clinical      | Lungs                       | USA                  | Washington                | <i>MAT1-2</i>    | (2)       |
| 78-6 <sup>d</sup>        | CBS 117886, FH 7                                    | Clinical      | Lungs                       | USA                  | Washington                | <i>MAT1-1</i>    | (2)       |
| 78-7 <sup>d</sup>        | IFI06-0001                                          | Clinical      | Lungs                       | USA                  | Washington                | <i>MAT1-2</i>    | (2)       |
| 78-8 <sup>d</sup>        | IFI06-0014                                          | Clinical      | Lungs                       | USA                  | Washington                | <i>MAT1-2</i>    | (2)       |
| 78-9 <sup>d</sup>        | IFI05-0046                                          | Clinical      | Lungs                       | USA                  | Washington                | <i>MAT1-2</i>    | (2)       |

|                    |                                   |               |                              |             |                   |               |      |
|--------------------|-----------------------------------|---------------|------------------------------|-------------|-------------------|---------------|------|
| 78-10              | CBS 117182, IBT 23163, IMI 306135 | Environmental | Soil treated with herbicides | Australia   | Western Australia | <i>MATI-1</i> |      |
| 78-11              | CBS 117180, IBT 23719, IMI 376377 | Environmental | <i>Coffea</i> sp.            | Denmark     | N/A               | <i>MATI-1</i> | (6)  |
| 78-12              | CBS 121597                        | Environmental | Cocoa beans                  | N/A         | N/A               | <i>MATI-1</i> |      |
| 78-13 <sup>d</sup> | CBS 175.97                        | Environmental | Dolphin nostril              | Netherlands | Harderwijk        | <i>MATI-2</i> | (1)  |
| 78-14 <sup>d</sup> | FH 1                              | Clinical      | Lungs                        | USA         | Washington        | <i>MATI-1</i> | (10) |
| 78-15              | FH 6                              | Clinical      | Kidneys                      | USA         | Washington        | <i>MATI-2</i> | (2)  |
| 78-16              | FH 84                             | Clinical      | N/A                          | USA         | Georgia           | <i>MATI-1</i> | (20) |
| 78-17              | FH 85                             | Clinical      | N/A                          | USA         | Georgia           | <i>MATI-2</i> | (20) |
| 78-18              | FH 86                             | Clinical      | N/A                          | USA         | Georgia           | <i>MATI-2</i> | (20) |
| 78-19 <sup>d</sup> | FH 219                            | Clinical      | Lungs                        | USA         | Washington        | <i>MATI-2</i> | (5)  |
| 78-20 <sup>d</sup> | CBS 117887, FH 220                | Clinical      | Mouth                        | USA         | Washington        | <i>MATI-1</i> | (2)  |

|                    |        |          |     |     |            |               |      |
|--------------------|--------|----------|-----|-----|------------|---------------|------|
| 78-21 <sup>d</sup> | FH 231 | Clinical | N/A | USA | Texas      | <i>MAT1-2</i> | (20) |
| 78-22              | FH 238 | Clinical | N/A | USA | Texas      | <i>MAT1-1</i> | (20) |
| 78-23              | FH 239 | Clinical | N/A | USA | Texas      | <i>MAT1-1</i> | (20) |
| 78-24 <sup>d</sup> | FH 265 | Clinical | N/A | USA | Washington | <i>MAT1-2</i> | (5)  |
| 78-25 <sup>d</sup> | FH 292 | Clinical | N/A | USA | Georgia    | <i>MAT1-2</i> |      |
| 78-26              | FH 293 | Clinical | N/A | USA | Washington | <i>MAT1-2</i> |      |

---

<sup>a</sup> BDUN Culture Collection, School of Biology, University of Nottingham, UK.

<sup>b</sup> FH, Fred Hutchinson Cancer Research Center, WA, USA; CBS, Centraalbureau voor Schimmelcultures, Utrecht, The Netherlands; KACC, Korean Agricultural Culture Collection, Suwon, Republic of Korea; IBT, IBT Culture Collection of Fungi, Technical University of Denmark, Lyngby, Denmark; IMI, CABI Bioscience, Egham, UK; NRRL, Agricultural Research Service Culture Collection, US Department of Agriculture, IL, USA.

<sup>c</sup> N/A, Information not available.

<sup>d</sup> Used in sexual crossing experiments.

<sup>e</sup> Type strain.

**Table S2.** Primers used in the study

| Primer | Sequence (5'–3')              | Target region            | Source or reference                      |
|--------|-------------------------------|--------------------------|------------------------------------------|
| AFM1   | CCTTGACGCGATGGGGTGG           | <i>MAT1-1</i> idiomorph  | (36)                                     |
| AFM2   | CGCTCCTCATCAGAACAAC<br>TCG    | <i>MAT1-2</i> idiomorph  | (36)                                     |
| AFM3   | CGGAAATCTGATGTCGCCAC<br>G     | 'Common' flanking region | (36)                                     |
| Loc1   | CAGAAGGGGCAAAAGGAC<br>AAGC    | 'Common' flanking region | (36)                                     |
| AL31   | CGGTTTCTCTCAATCCAAGC          | <i>MAT1-2</i> idiomorph  | This study                               |
| AL32   | AGAAACATCGGCTTCAGGG           | <i>MAT1-1</i> idiomorph  | This study                               |
| AL33   | TGGGCTTTGGTGTCTTGGAG          | <i>MAT1-1</i> idiomorph  | This study                               |
| AL34   | GGTAACCGTAACGCTGAACG          | <i>MAT1-2</i> idiomorph  | This study                               |
| AL51   | TAAGGCGGGATTGACACAC           | <i>MAT1-1</i> idiomorph  | This study                               |
| AL52   | ATCTTCGGCGTGCTTCTTC           | <i>MAT1-2</i> idiomorph  | This study                               |
| AL53   | AAGCATCCTGCCACAAGA            | <i>MAT1-2</i> idiomorph  | This study                               |
| OMT1   | GTGGACGGACCTAGT<br>CCGACATCAC | Unknown (RAPD)           | (73)                                     |
| R108   | GTATTGCCCT                    | Unknown (RAPD)           | (74)                                     |
| R151   | GCTGTAGTGT                    | Unknown (RAPD)           | (74)                                     |
| OPWO8  | GACTGCCTCT                    | Unknown (RAPD)           | RAPD 10mer kit W, Eurofins<br>MWG Operon |

**Table S3.** Mean numbers of cleistothecia\* produced by 14 *Aspergillus lentulus* crosses on oatmeal agar at 28 °C or 30 °C in the dark after seven weeks

|               |      | <i>MAT1-1</i> |      |       |      |
|---------------|------|---------------|------|-------|------|
| Crosses       |      | 28 °C         |      | 30 °C |      |
|               |      | 78-3          | 78-6 | 78-3  | 78-6 |
| <i>MAT1-2</i> | 78-1 | +             | –    | –     | –    |
|               | 78-2 | >             | +    | ++++  | +++  |
|               | 78-4 | –             | –    | –     | –    |
|               | 78-5 | –             | –    | –     | –    |
|               | 78-7 | –             | –    | –     | –    |
|               | 78-8 | +             | +    | +     | –    |
|               | 78-9 | –             | –    | +     | +    |

\*Ratings indicate the mean number of cleistothecia produced from three replicate crosses on oatmeal agar in 9-cm diameter Petri dishes after incubation in the dark. –, none; +, 1-19; +++, 40-59; +++++, 80-100; >, more than 100 cleistothecia.



**Table S4.** Mean numbers of cleistothecia\* produced by 20 *Aspergillus lentulus* crosses on oatmeal agar at 28 °C in the dark after three weeks

| Crosses             | <i>MAT1-1</i> |      |       |       |
|---------------------|---------------|------|-------|-------|
|                     | 78-3          | 78-6 | 78-14 | 78-20 |
| <i>MAT1-2</i> 78-13 | +++           | –    | –     | +     |
| 78-19               | –             | –    | –     | ++    |
| 78-21               | +             | –    | –     | +     |
| 78-24               | +++           | –    | –     | –     |
| 78-25               | –             | –    | –     | ++++  |

\*Ratings indicate the mean number of cleistothecia produced from three replicate crosses on oatmeal agar in 9-cm diameter Petri dishes after incubation in the dark for three weeks at 28 °C: –, none; +, 1-19; ++, 20-39; +++, 40-59; +++++, 80-100; >, more than 100 cleistothecia.

### **Diagnosis of the *Aspergillus lentulus* neosartorya-morph**

MycoBank No.: MB356679

Heterothallic fungus. Cleistothecia produced on oatmeal agar at 28 °C and 30 °C after three weeks, superficial, globose to subglobose, 300-500 µm in diameter, grouped in clusters, at first white then turning light yellow to pale orange-yellow. Peridium composed of several layers of tightly interwoven, often flattened hyphae. Asci globose to subglobose, hyaline, containing eight ascospores, evanescent at maturity. Ascospores spherical to lenticular, 3-4 x 4-6 µm, with two distinct equatorial ridges, often with additional inner partial secondary ridges, convex surface ornamentation of reticulate ridges and small point projections. Anamorph: *Aspergillus lentulus* Balajee & K.A. Marr 2005.

**Holotype:** Dried oatmeal agar specimen with teleomorph of paired *Aspergillus lentulus* colonies, 78-6 (*MAT1-1*) x 78-2 (*MAT1-2*), deposited with the Fungarium of the Royal Botanic Gardens, Kew (K) [K(M) 181782].

### **Supplementary References**

- 73. Geisen R.** 1996. Multiplex polymerase chain reaction for the detection of potential aflatoxin and sterigmatocystin producing fungi. *Syst. Appl. Microbiol.* **19**:388–392.
- 74. Aufauvre-Brown A, Cohen J, Holden DW.** 1992. Use of randomly amplified polymorphic DNA markers to distinguish isolates of *Aspergillus fumigatus*. *J. Clin. Microbiol.* **30**:2991–2993.
